# Supplementary material for: Dysregulation of the Immune System in HIV/HCV-Coinfected Patients According to Liver Stiffness Status
Source: Cells. 2018 Nov 2;7(11):196. doi: 10.3390/cells7110196 (PMC6262386; doi:10.3390/cells7110196)
Supplement: Supplementary file 1 [file cells-07-00196-s001.pdf]

**Table S1.** Characteristics of control groups and HIV/HCV co-infected patients.

|                                                 | Healthy blood<br>subjects | HIV<br>monoinfected<br>patients | HIV/HCV<br>coinfected<br>patients | p-<br>values     |
|-------------------------------------------------|---------------------------|---------------------------------|-----------------------------------|------------------|
| No.                                             | 32                        | 39                              | 206                               | -                |
| Gender (male)                                   | 17 (53.1%)                | 24 (61.5%)                      | 162 (78.6%)                       | <b>0.002</b>     |
| Age (years)                                     | 49.5 (47; 53)             | 51 (46; 53)                     | 49 (46; 52)                       | 0.342            |
| BMI (kg/m <sup>2</sup> )                        | 24.9 (23.1; 27.1)         | 25.3 (23.5; 26.6)               | 24.4 (21.8; 26.8)                 | 0.236            |
| Diabetes                                        | -                         | 6 (15.8%)                       | 18 (8.7%)                         | 0.181            |
| Current alcohol drinker (>50<br>g/day)          | -                         | 1 (2.5%)                        | 6 (2.9%)                          | 0.891            |
| Alcohol ex-drinker                              | -                         | 0 (0%)                          | 101 (49.3%)                       | <b>&lt;0.001</b> |
| HIV acquired by IVDU                            | -                         | 0 (0%)                          | 160 (78.8%)                       | <b>&lt;0.001</b> |
| Prior AIDS                                      | -                         | 13 (33.3%)                      | 54 (26.6%)                        | 0.397            |
| Years since HIV infection                       | -                         | -                               | 23 (18; 26)                       | -                |
| Years since HCV infection                       | -                         | -                               | 21 (17; 24)                       | -                |
| Antiretroviral therapy                          |                           |                                 |                                   |                  |
| Non treated                                     | -                         | 0 (0%)                          | 3 (1.5%)                          | 0.446            |
| PI-based                                        | -                         | 10 (25.6%)                      | 29 (14.3%)                        | 0.087            |
| 2NRTI+II-based                                  | -                         | 4 (10.2%)                       | 53 (26.1%)                        | <b>0.038</b>     |
| 2NRTI+PI-based                                  | -                         | 0 (0%)                          | 42 (20.7%)                        | <b>0.003</b>     |
| 2NRTI+NNRTI-based                               | -                         | 23 (64.1%)                      | 64 (31.5%)                        | <b>&lt;0.001</b> |
| Others                                          | -                         | 2 (5.1%)                        | 15 (7.2%)                         | 0.845            |
| HIV markers                                     |                           |                                 |                                   |                  |
| Nadir CD4+ T-cells                              | -                         | 215 (107; 343)                  | 172 (87; 252)                     | <b>0.033</b>     |
| Nadir CD4+ T-cells<200<br>cells/mm <sup>3</sup> | -                         | 14 (38.9%)                      | 113 (58.9%)                       | <b>0.026</b>     |
| CD4+ T-cells #                                  | -                         | 832 (685; 1036)                 | 558 (394; 808)                    | <b>&lt;0.001</b> |
| CD4+ T-cells<500 cells/mm <sup>3</sup>          | -                         | 0 (0%)                          | 83 (40.3%)                        | <b>&lt;0.001</b> |
| HIV-RNA >50 cp/mL                               | -                         | 0 (0%)                          | 0 (0%)                            | 0.999            |
| HCV markers                                     |                           |                                 |                                   |                  |
| HCV genotype                                    |                           |                                 |                                   |                  |
| 1                                               | -                         | -                               | 149 (72.7%)                       | -                |
| 2                                               | -                         | -                               | 5 (2.4%)                          | -                |
| 3                                               | -                         | -                               | 35 (16.5%)                        | -                |
| 4                                               | -                         | -                               | 17 (8.3%)                         | -                |
| Log10 HCV-RNA (IU/ml)                           | -                         | -                               | 6.29 (5.83; 6.71)                 | -                |
| HCV-RNA > 850,000 IU/ml                         | -                         | -                               | 144 (69.9%)                       | -                |

**Statistics:** Categorical variables are expressed as the absolute count (percentage). Continuous variables are expressed as the median (percentile 25; percentile 75). P-values were estimated with a nonparametric Mann-Whitney U test for continuous variables and Chi-square for categorical variables.

**Abbreviations:** HCV, Hepatitis C virus; HCV-RNA, HCV plasma viral load; HIV-1, Human immunodeficiency virus type 1; HIV-RNA, HIV plasma viral load; IVDU, intravenous drug user; NNRTI, non-nucleoside analogue HIV reverse transcriptase inhibitor; NRTI, nucleoside analogue HIV reverse transcriptase inhibitor; PI, protease inhibitor; II, integrase inhibitor.
